# Supplementary material for: Product Factors Affecting Milk Choices among Chinese Older Adults
Source: MDPI journal article supplement (doi:10.3390/foods13030371), 2024-01-23
Supplement: s1 [file s1]

Supplementary Material

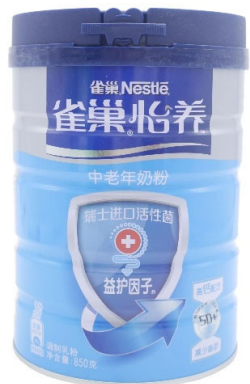

Product N

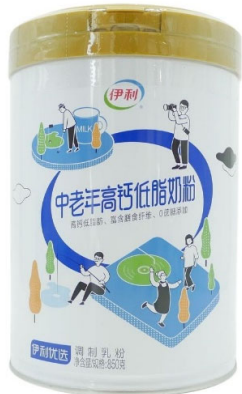

Product Y

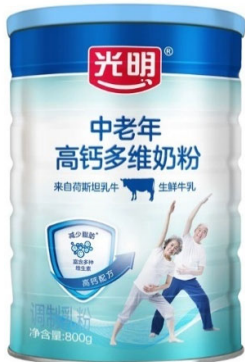

Product B

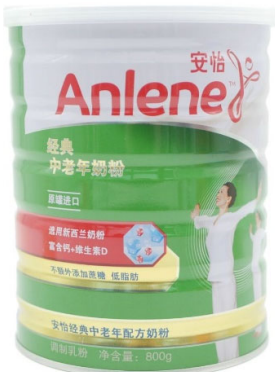

Product A

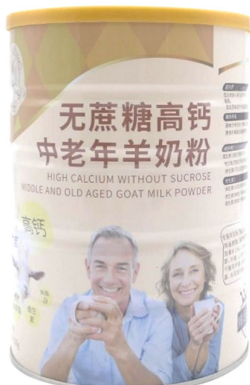

Product Z

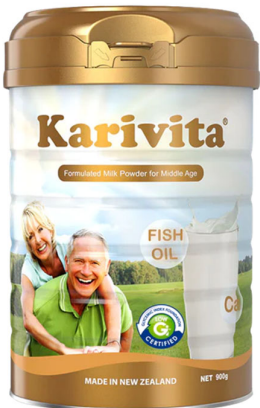

Product K

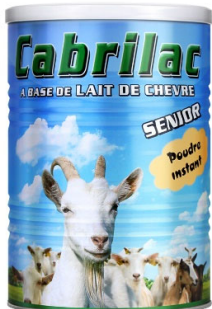

Product C

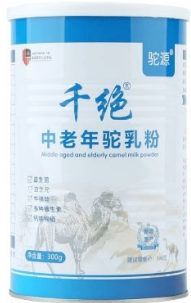

Product Q

**Figure S1.** Front-of-pack images of the product alternatives in choice simulations. Images have received permissions for use from Mintel Group Ltd.
